# Supplementary material
Source: PubMed Central journal article supplement (PMC2915496)
Supplement: kwq088_1.pdf [file kwq088_1.pdf]

## Web Tables

Web Table 1 shows that the increasing trend in the odds ratios (OR) by pack-years adjusted for cigarettes smoked per day (CPD) relative to never-smokers and by CPD adjusted for pack-years relative to the lowest CPD category was greater with leaner body mass index (BMI) for oral cavity/pharyngeal, while ORs by pack-years or by CPD were unrelated to BMI for laryngeal cancer. Figure 1 plots these ORs.

Web Table 2 shows that estimates of the excess odds ratio per pack-year (EOR/pack-year), i.e., the strength of the association between disease and pack-years, decreased in the higher CPD categories, as seen in Figure 2. In addition, the EOR/pack-year estimates for oral cavity/pharyngeal cancer were generally higher in the leaner categories of BMI, while the EOR/pack-year estimates for laryngeal cancer were unrelated to BMI.

Web Table 3 shows that except for light drinkers who were  $<18.5$  BMI, ORs for oral cavity/pharyngeal cancer by drink-years and by DPD were consistently greater with leaner BMI. In contrast, for laryngeal cancer, ORs by drink-years and by DPD were unrelated to BMI. Figure 3 plots these ORs.

Web Table 4 shows that estimates of EOR/drink-year generally increased with increasing DPD, particularly through five DPD, indicating an increased strength of the association of disease and drink-years with increasing DPD, as seen in Figure 4. In addition, the EOR/drink-year estimates for oral cavity/pharyngeal cancer were generally higher in leaner BMI, while the estimates for laryngeal cancer did not vary with BMI.

Web Table 1: Odds ratios<sup>a</sup> for head and neck cancers with 95 percent confidence interval by pack-years of smoking and by cigarettes smoked per day within categories of body mass index (BMI) used in Figure 1. Data from INHANCE consortium of case-control studies of head and neck cancer.

| BMI                                  | 0 <sup>b</sup> | Pack-years of smoking |                         |                         |                         |                         | Cigarettes smoked per day |                      |                      |                      |
|--------------------------------------|----------------|-----------------------|-------------------------|-------------------------|-------------------------|-------------------------|---------------------------|----------------------|----------------------|----------------------|
|                                      |                | 1-19                  | 20-39                   | 40-49                   | 50-59                   | 60+                     | <20 <sup>b</sup>          | 20-29                | 30-39                | 40+                  |
| <i>Oral cavity/pharyngeal cancer</i> |                |                       |                         |                         |                         |                         |                           |                      |                      |                      |
| <18.5                                | 1.00           | 6.96<br>(3.70, 13.09) | 6.45<br>(2.89, 14.38)   | 7.65<br>(3.01, 19.40)   | 21.6<br>(5.70, 81.90)   | 8.44<br>(3.69, 19.27)   | 1.00                      | 1.53<br>(0.86, 2.73) | 2.60<br>(0.91, 7.46) | 0.74<br>(0.32, 1.70) |
| 18.5-24.9                            | 1.00           | 3.64<br>(3.00, 4.43)  | 5.87<br>(4.50, 7.67)    | 6.58<br>(4.81, 8.99)    | 6.82<br>(4.68, 9.94)    | 9.18<br>(6.19, 13.62)   | 1.00                      | 1.39<br>(1.12, 1.72) | 1.63<br>(1.13, 2.34) | 1.54<br>(1.04, 2.28) |
| 25.9-29.9                            | 1.00           | 1.7<br>(1.33, 2.17)   | 3.01<br>(2.18, 4.16)    | 3.52<br>(2.45, 5.06)    | 4.09<br>(2.54, 6.58)    | 4.19<br>(2.75, 6.38)    | 1.00                      | 0.97<br>(0.74, 1.27) | 1.02<br>(0.67, 1.54) | 1.00<br>(0.65, 1.55) |
| 30+                                  | 1.00           | 1.42<br>(0.96, 2.09)  | 2.32<br>(1.36, 3.96)    | 2.15<br>(1.06, 4.36)    | 2.54<br>(1.23, 5.25)    | 4.25<br>(2.44, 7.39)    | 1.00                      | 0.81<br>(0.53, 1.26) | 0.77<br>(0.41, 1.46) | 0.81<br>(0.45, 1.48) |
| <i>Laryngeal cancer</i>              |                |                       |                         |                         |                         |                         |                           |                      |                      |                      |
| <18.5                                | 1.00           | 7.25<br>(1.73, 30.43) | 5.76<br>(1.26, 26.41)   | 15.80<br>(2.56, 97.72)  | 205.40<br>(12.0, 3,503) | 4.93<br>(0.90, 27.00)   | 1.00                      | 0.60<br>(0.21, 1.73) | 1.12<br>(0.20, 6.15) | 0.21<br>(0.04, 1.20) |
| 18.5-24.9                            | 1.00           | 8.69<br>(5.56, 13.59) | 19.41<br>(11.84, 31.83) | 19.30<br>(11.19, 33.29) | 18.54<br>(9.73, 35.34)  | 32.76<br>(16.63, 64.52) | 1.00                      | 1.38<br>(0.99, 1.91) | 1.86<br>(1.05, 3.31) | 2.27<br>(1.22, 4.23) |
| 25.9-29.9                            | 1.00           | 6.86<br>(4.26, 11.02) | 11.18<br>(6.47, 19.31)  | 14.48<br>(8.11, 25.86)  | 33.78<br>(16.34, 69.84) | 15.74<br>(7.86, 31.50)  | 1.00                      | 1.77<br>(1.20, 2.61) | 1.26<br>(0.65, 2.47) | 1.45<br>(0.73, 2.89) |
| 30+                                  | 1.00           | 3.14<br>(1.30, 7.60)  | 13.28<br>(5.68, 31.07)  | 24.62<br>(9.77, 62.07)  | 20.38<br>(6.52, 63.74)  | 23.06<br>(9.13, 58.24)  | 1.00                      | 2.90<br>(1.49, 5.68) | 2.00<br>(0.75, 5.33) | 3.82<br>(1.53, 9.51) |

<sup>a</sup> Odds ratios adjusted for study/center, age, sex, education, drink-years, drinks per day and body mass index. Data included never smokers and current cigarette-only smokers.

<sup>b</sup> Referent category.

Web Table 2: Estimates of excess odds ratio <sup>a</sup> per pack-year with 95 percent confidence interval within categories of cigarettes smoked per day and body mass index (BMI) used in Figure 2. Data from INHANCE consortium of case-control studies of head and neck cancer.

| BMI                                      | Cigarettes smoked per day |                      |                      |                      |                      |                      |
|------------------------------------------|---------------------------|----------------------|----------------------|----------------------|----------------------|----------------------|
|                                          | <10                       | 10-19                | 20-29                | 30-39                | 40-49                | 50+                  |
| <i>Oral cavity and pharyngeal cancer</i> |                           |                      |                      |                      |                      |                      |
| <18.5                                    | 0.35<br>(0.11, 1.11)      | 0.56<br>(0.23, 1.34) | 0.27<br>(0.13, 0.55) | 0.42<br>(0.14, 1.30) | 0.14<br>(0.05, 0.43) | 0.02<br>(0.00, 0.13) |
| 18.5-24.9                                | 0.26<br>(0.17, 0.41)      | 0.17<br>(0.13, 0.22) | 0.16<br>(0.13, 0.20) | 0.17<br>(0.13, 0.24) | 0.14<br>(0.10, 0.19) | 0.09<br>(0.05, 0.17) |
| 25.0-29.9                                | 0.03<br>(0.00, 0.20)      | 0.07<br>(0.04, 0.10) | 0.07<br>(0.05, 0.10) | 0.07<br>(0.05, 0.11) | 0.07<br>(0.05, 0.11) | 0.02<br>(0.01, 0.04) |
| 30.0+                                    | 0.00 <sup>b</sup>         | 0.04<br>(0.02, 0.10) | 0.05<br>(0.03, 0.10) | 0.05<br>(0.02, 0.11) | 0.05<br>(0.02, 0.10) | 0.02<br>(0.00, 0.08) |
| <i>Laryngeal cancer</i>                  |                           |                      |                      |                      |                      |                      |
| <18.5                                    | 0.53<br>(0.07, 3.96)      | 0.4<br>(0.09, 1.87)  | 0.22<br>(0.05, 1.11) | 0.38<br>(0.05, 2.89) | 0.03<br>(0.00, 0.60) | 0.08<br>(0.00, 3.62) |
| 18.5-24.9                                | 0.70<br>(0.35, 1.39)      | 0.54<br>(0.33, 0.88) | 0.67<br>(0.42, 1.08) | 0.82<br>(0.46, 1.47) | 0.79<br>(0.44, 1.44) | 0.67<br>(0.21, 2.16) |
| 25.0-29.9                                | 0.42<br>(0.17, 0.99)      | 0.34<br>(0.20, 0.58) | 0.60<br>(0.38, 0.98) | 0.38<br>(0.20, 0.75) | 0.30<br>(0.15, 0.60) | 0.45<br>(0.15, 1.37) |
| 30.0+                                    | 0.00 <sup>b</sup>         | 0.19<br>(0.07, 0.52) | 0.75<br>(0.35, 1.59) | 0.44<br>(0.16, 1.21) | 0.68<br>(0.26, 1.75) | 0.47<br>(0.10, 2.18) |

<sup>a</sup> Models adjusted for study/center, age, sex, education, drink-years and drinks per day. Data include never smokers and current cigarette-only smokers.

<sup>b</sup> Denotes zero or not estimable.

WebTable 3: Odds ratios <sup>a</sup> for head and neck cancers with 95 percent confidence interval by drink-years and by drinks per day within categories of body mass index (BMI) used in Figure 3. Data from INHANCE consortium of case-control studies of head and neck cancer.

| BMI                                  | 0 <sup>b</sup> | Drink-years          |                       |                      |                       |                       | <1 <sup>b</sup> | Drinks per day       |                      |                        |
|--------------------------------------|----------------|----------------------|-----------------------|----------------------|-----------------------|-----------------------|-----------------|----------------------|----------------------|------------------------|
|                                      |                | 1-49                 | 50-99                 | 100-149              | 150-199               | 200+                  |                 | 1-2.9                | 3.0-4.9              | 5.0-10.0               |
| <i>Oral cavity/pharyngeal cancer</i> |                |                      |                       |                      |                       |                       |                 |                      |                      |                        |
| <18.5                                | 1.00           | 0.69<br>(0.43, 1.11) | 1.35<br>(0.69, 2.65)  | 3.14<br>(1.33, 7.46) | 8.92<br>(2.40, 33.09) | 5.01<br>(1.79, 14.03) | 1.00            | 1.41<br>(0.86, 2.33) | 2.63<br>(1.22, 5.66) | 11.55<br>(4.36, 30.61) |
| 18.5-24.9                            | 1.00           | 1.18<br>(0.99, 1.39) | 1.92<br>(1.50, 2.46)  | 2.12<br>(1.59, 2.83) | 2.71<br>(1.94, 3.80)  | 3.26<br>(2.31, 4.59)  | 1.00            | 1.75<br>(1.47, 2.09) | 2.32<br>(1.80, 2.99) | 3.51<br>(2.60, 4.74)   |
| 25.9-29.9                            | 1.00           | 1.16<br>(0.95, 1.40) | 1.38<br>(1.06, 1.80)  | 1.47<br>(1.07, 2.01) | 1.3<br>(0.89, 1.88)   | 1.88<br>(1.31, 2.68)  | 1.00            | 1.17<br>(0.96, 1.42) | 1.35<br>(1.03, 1.77) | 2.21<br>(1.62, 3.02)   |
| 30+                                  | 1.00           | 0.88<br>(0.68, 1.13) | 0.90<br>(0.61, 1.33)  | 1.21<br>(0.77, 1.90) | 0.63<br>(0.35, 1.14)  | 1.32<br>(0.82, 2.12)  | 1.00            | 1.10<br>(0.83, 1.45) | 1.17<br>(0.79, 1.72) | 1.44<br>(0.95, 2.19)   |
| <i>Laryngeal cancer</i>              |                |                      |                       |                      |                       |                       |                 |                      |                      |                        |
| <18.5                                | 1.00           | 1.15<br>(0.38, 3.49) | 4.18<br>(1.13, 15.37) | 1.34<br>(0.33, 5.47) | 2.17<br>(0.40, 11.65) | 3.26<br>(0.75, 14.16) | 1.00            | 1.35<br>(0.51, 3.55) | 1.11<br>(0.35, 3.52) | 4.43<br>(1.24, 15.91)  |
| 18.5-24.9                            | 1.00           | 0.88<br>(0.64, 1.21) | 0.93<br>(0.61, 1.42)  | 1.1<br>(0.69, 1.77)  | 1.33<br>(0.77, 2.29)  | 1.34<br>(0.78, 2.30)  | 1.00            | 1.16<br>(0.85, 1.59) | 1.26<br>(0.82, 1.93) | 1.76<br>(1.09, 2.83)   |
| 25.9-29.9                            | 1.00           | 1.03<br>(0.72, 1.47) | 0.82<br>(0.51, 1.33)  | 1.03<br>(0.61, 1.74) | 1.28<br>(0.72, 2.27)  | 1.62<br>(0.92, 2.86)  | 1.00            | 0.94<br>(0.67, 1.33) | 0.90<br>(0.57, 1.41) | 1.97<br>(1.21, 3.20)   |
| 30+                                  | 1.00           | 1.09<br>(0.64, 1.85) | 1.1<br>(0.55, 2.23)   | 1.77<br>(0.80, 3.90) | 2.08<br>(0.91, 4.77)  | 2.27<br>(1.10, 4.69)  | 1.00            | 1.10<br>(0.66, 1.83) | 1.58<br>(0.85, 2.94) | 2.42<br>(1.32, 4.43)   |

<sup>a</sup> Odds ratios adjusted for study/center, age, sex, education, pack-years, cigarettes smoked per day and use of other tobacco products. Data include never drinkers and subjects consuming 10 drinks per day or less.

<sup>b</sup> Referent category.

Web Table 4: Estimates of the excess odds ratio per drink-year with 95 percent confidence interval within categories of drinks per day by categories of body mass index (BMI) used in Figure 4. Data from INHANCE consortium of case-control studies of head and neck cancer.

| BMI                                      | Drinks per day        |                        |                       |                       |                       |                       |                       |
|------------------------------------------|-----------------------|------------------------|-----------------------|-----------------------|-----------------------|-----------------------|-----------------------|
|                                          | <0.5                  | 0.5-0.9                | 1.0-1.9               | 2.0-2.9               | 3.0-4.9               | 5.0-6.9               | 7.0-10.0              |
| <i>Oral cavity and pharyngeal cancer</i> |                       |                        |                       |                       |                       |                       |                       |
| <18.5                                    | 0.000 <sup>b</sup>    | 0.000 <sup>b</sup>     | 0.007<br>(0.00, 0.16) | 0.017<br>(0.01, 0.05) | 0.021<br>(0.01, 0.06) | 0.148<br>(0.04, 0.61) | 0.122<br>(0.02, 0.64) |
| 18.5-24.9                                | 0.003<br>(0.00, 4.83) | 0.020<br>(0.01, 0.04)  | 0.029<br>(0.02, 0.05) | 0.022<br>(0.02, 0.03) | 0.023<br>(0.02, 0.03) | 0.019<br>(0.01, 0.03) | 0.033<br>(0.02, 0.04) |
| 25.0-29.9                                | 0.006<br>(0.00, 0.32) | 0.014<br>(0.01, 0.03)  | 0.012<br>(0.01, 0.03) | 0.009<br>(0.00, 0.01) | 0.010<br>(0.01, 0.02) | 0.016<br>(0.01, 0.02) | 0.016<br>(0.01, 0.02) |
| 30.0+                                    | 0.000 <sup>b</sup>    | 0.004<br>(0.00, 0.14)  | 0.006<br>(0.00, 0.05) | 0.007<br>(0.00, 0.02) | 0.005<br>(0.00, 0.01) | 0.009<br>(0.00, 0.02) | 0.006<br>(0.00, 0.01) |
| <i>Laryngeal cancer</i>                  |                       |                        |                       |                       |                       |                       |                       |
| <18.5                                    | 0.000 <sup>b</sup>    | 0.000 <sup>b</sup>     | 0.000 <sup>b</sup>    | 0.013<br>(0.00, 0.11) | 0.001<br>(0.00, 4.93) | 0.016<br>(0.00, 0.17) | 0.058<br>(0.01, 0.43) |
| 18.5-24.9                                | 0.000 <sup>b</sup>    | 0.000 <sup>b</sup>     | 0.010<br>(0.00, 0.04) | 0.001<br>(0.00, 0.07) | 0.004<br>(0.00, 0.01) | 0.003<br>(0.00, 0.01) | 0.009<br>(0.01, 0.01) |
| 25.0-29.9                                | 0.011<br>(0.00, 0.44) | 0.001<br>(0.00, 56.12) | 0.002<br>(0.00, 0.28) | 0.001<br>(0.00, 0.19) | 0.002<br>(0.00, 0.01) | 0.008<br>(0.00, 0.01) | 0.008<br>(0.00, 0.01) |
| 30.0+                                    | 0.021<br>(0.00, 0.46) | 0.000 <sup>b</sup>     | 0.000 <sup>b</sup>    | 0.004<br>(0.00, 0.05) | 0.006<br>(0.00, 0.02) | 0.014<br>(0.01, 0.03) | 0.010<br>(0.00, 0.02) |

<sup>a</sup> Models adjusted for study/center, age, sex, education, pack-years, cigarettes smoked per day and use of other tobacco products. Data include never drinkers and subjects consuming 10 drinks per day or less.

<sup>b</sup> Denotes zero or not estimable.
